# Supplementary material for: Dissecting maternal and fetal genetic effects underlying the associations between maternal phenotypes, birth outcomes, and adult phenotypes: A mendelian-randomization and haplotype-based genetic score analysis in 10,734 mother–infant pairs
Source: PLOS journal article supplement (doi:10.1371/journal.pmed.1003305), 2020-08-25
Supplement: S35 (10.1371/journal.pmed.1003305.s035) [file redirect.do]

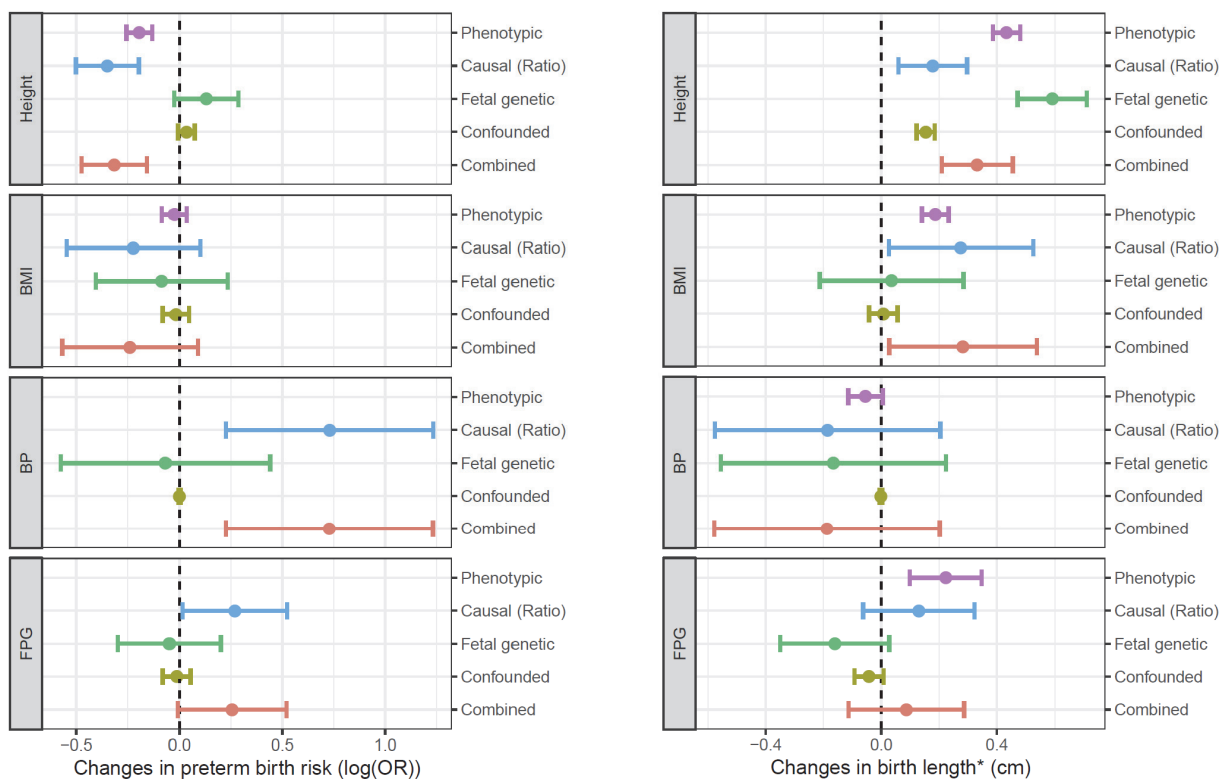

**S13 Fig. Estimated sizes of causal effects and genetically confounded associations per 1-SD changes in maternal traits on preterm birth risk and birth length**

The 1-SD values for maternal traits are: 6.4cm (height), 4.0kg/m<sup>2</sup> (BMI), 5.8mmHg (BP) and 0.36mmol/L (FPG). BMI, body mass index; BP, blood pressure; FPG, fasting plasma glucose; SD, standard deviation.
